# Supplementary material
Source: MDPI journal article supplement (https://www.mdpi.com/1996-1073/12/10/2025)
Supplement: s1 [file s1]

*Table S1 Fossil fuel types and emission factors used in this study.*

| No. (t) | Industry process              | Category | NCV <sub>i</sub> (PJ/10 <sup>4</sup> ton, 10 <sup>8</sup> m <sup>3</sup> ) | CC <sub>i</sub> (ton CO <sub>2</sub> /TJ) |
|---------|-------------------------------|----------|----------------------------------------------------------------------------|-------------------------------------------|
| 1       | Raw coal                      | Coal     | 0.21                                                                       | 96.51                                     |
| 2       | Cleaned coal                  |          | 0.26                                                                       | 96.51                                     |
| 3       | Other washed coal             |          | 0.15                                                                       | 96.51                                     |
| 4       | Briquettes                    |          | 0.18                                                                       | 96.51                                     |
| 5       | Coke                          |          | 0.28                                                                       | 115.07                                    |
| 6       | Coke oven gas                 | Oil      | 1.61                                                                       | 78.80                                     |
| 7       | Other gas                     |          | 0.83                                                                       | 78.80                                     |
| 8       | Other coking products         |          | 0.28                                                                       | 100.64                                    |
| 9       | Crude oil                     |          | 0.43                                                                       | 73.63                                     |
| 10      | Gasoline                      |          | 0.44                                                                       | 69.30                                     |
| 11      | Kerosene                      |          | 0.44                                                                       | 71.87                                     |
| 12      | Diesel oil                    |          | 0.43                                                                       | 74.07                                     |
| 13      | Fuel oil                      |          | 0.43                                                                       | 77.37                                     |
| 14      | Liquefied petroleum gas (LPG) |          | 0.51                                                                       | 63.07                                     |
| 15      | Refinery gas                  |          | 0.47                                                                       | 73.33                                     |
| 16      | Other petroleum products      | Gas      | 0.43                                                                       | 74.07                                     |
| 17      | Nature gas                    |          | 3.89                                                                       | 56.17                                     |

*Table S2 Industry processes involved in this study and related emission factors.*

| No. (t) | Industry process              | EFt (ton/ton) | Allocation sectors                           |
|---------|-------------------------------|---------------|----------------------------------------------|
| 1       | Ammonia production            | 1.5000        | Raw Chemical Materials and Chemical Products |
| 2       | Soda Ash production           | 0.4150        | Raw Chemical Materials and Chemical Products |
| 3       | Cement production             | 0.4985        | Non-metal Mineral Products                   |
| 4       | Lime production               | 0.6830        | Non-metal Mineral Products                   |
| 5       | Ferrochromium production      | 1.3000        | Smelting and Pressing of Ferrous Metals      |
| 6       | Silicon metal production      | 4.3000        | Smelting and Pressing of Ferrous Metals      |
| 7       | Ferro-unclassified production | 4.0000        | Smelting and Pressing of Ferrous Metals      |

*Table S3 Sectoral categories of the NAQSIQ.*

| <i>No. (j)</i> | <i>Socioeconomic sectors</i>                                       | <i>Category</i>     |
|----------------|--------------------------------------------------------------------|---------------------|
| 1              | Farming, Forestry, Animal Husbandry, Fishery and Water Conservancy | Farming sector      |
| 2              | Coal Mining and Dressing                                           | Energy production   |
| 3              | Petroleum and Natural Gas Extraction                               | Energy production   |
| 4              | Ferrous Metals Mining and Dressing                                 | Heavy manufacturing |
| 5              | Nonferrous Metals Mining and Dressing                              | Heavy manufacturing |
| 6              | Non-metal Minerals Mining and Dressing                             | Heavy manufacturing |
| 7              | Other Minerals Mining and Dressing                                 | Heavy manufacturing |
| 8              | Food Processing                                                    | Light manufacturing |
| 9              | Food Production                                                    | Light manufacturing |
| 10             | Beverage Production                                                | Light manufacturing |
| 11             | Tobacco Processing                                                 | Light manufacturing |
| 12             | Textile Industry                                                   | Light manufacturing |
| 13             | Garments and Other Fibre Products                                  | Light manufacturing |
| 14             | Leather, Furs, Down and Related Products                           | Light manufacturing |
| 15             | Timber Processing, Bamboo, Cane, Palm Fibre & Straw Products       | Light manufacturing |
| 16             | Furniture Manufacturing                                            | Light manufacturing |
| 17             | Papermaking and Paper Products                                     | Light manufacturing |
| 18             | Printing and Record Medium Reproduction                            | Light manufacturing |
| 19             | Cultural, Educational and Sports Articles                          | Light manufacturing |
| 20             | Petroleum Processing and Coking                                    | Energy production   |
| 21             | Raw Chemical Materials and Chemical Products                       | Heavy manufacturing |
| 22             | Medical and Pharmaceutical Products                                | Light manufacturing |
| 23             | Chemical Fibre                                                     | Heavy manufacturing |
| 24             | Rubber Products                                                    | Heavy manufacturing |
| 25             | Plastic Products                                                   | Heavy manufacturing |
| 26             | Non-metal Mineral Products                                         | Heavy manufacturing |
| 27             | Smelting and Pressing of Ferrous Metals                            | Heavy manufacturing |
| 28             | Smelting and Pressing of Nonferrous Metals                         | Heavy manufacturing |
| 29             | Metal Products                                                     | Heavy manufacturing |
| 30             | Ordinary Machinery                                                 | Heavy manufacturing |
| 31             | Equipment for Special Purposes                                     | Heavy manufacturing |
| 32             | Transportation Equipment manufacturing                             | Heavy manufacturing |
| 33             | Electric Equipment and Machinery                                   | High-tech industry  |
| 34             | Electronic and Telecommunications Equipment                        | High-tech industry  |
| 35             | Instruments, Meters, Cultural and Office Machinery                 | High-tech industry  |
| 36             | Other Manufacturing Industry                                       | High-tech industry  |
| 37             | Scrap and waste                                                    | High-tech industry  |
| 38             | Production and Supply of Electric Power, Steam and Hot Water       | Energy production   |
| 39             | Production and Supply of Gas                                       | Energy production   |
| 40             | Production and Supply of Tap Water                                 | Heavy manufacturing |

|    |                                                              |                   |
|----|--------------------------------------------------------------|-------------------|
| 41 | Construction                                                 | Construction      |
| 42 | Transportation, Storage, Post and Telecommunication Services | Services sectors  |
| 43 | Wholesale, Retail Trade and Catering Services                |                   |
| 44 | Other service sectors                                        |                   |
| 45 | Urban                                                        | Residential usage |
| 46 | Rural                                                        |                   |
| 47 | Other                                                        | Other             |
